# Supplementary material for: CO2as a smart gelator for Pluronic aqueous solutions
Source: Royal Society of Chemistry journal article supplement (doi:10.1039/c4cc06623e), 2014-09-24
Supplement: c4cc06623e1.pdf [file c4cc06623e1.pdf]

## CO<sub>2</sub> as a smart gelator for Pluronic aqueous solution

Chengcheng Liu,<sup>a</sup> Qingqing Mei,<sup>a</sup> Jianling Zhang,<sup>\*a</sup> Xinchun Kang,<sup>a</sup> Li Peng,<sup>a</sup> Buxing Han,<sup>a</sup> Zhimin Xue,<sup>a</sup> Xinxin Sang,<sup>a</sup> Xiaogan Yang,<sup>a</sup> Zhonghua Wu,<sup>b</sup> Zhihong Li,<sup>b</sup> and Guang Mo<sup>b</sup>

<sup>a</sup>Beijing National Laboratory for Molecular Sciences, Institute of Chemistry, Chinese Academy of Sciences, Beijing 100190, China

<sup>b</sup>Beijing Synchrotron Radiation Facility (BSRF), Institute of High Energy Physics, Chinese Academy of Sciences, Beijing 100049, China

\*e-mail: zhangjl@iccas.ac.cn

### 1. EXPERIMENTAL PROCEDURES

**Materials.** F87 (EO<sub>62</sub>PO<sub>39</sub>EO<sub>62</sub>) was provided by BASF company and used without further purification. CO<sub>2</sub> (>99.95% purity) and ethylene (>99.9% purity) were provided by Beijing Analysis Instrument Factory. Double-distilled water was used throughout the experiments. Methyl orange (MO, analytical grade) and hydrochloric acid were provided by Beijing Chemical Plant. Tetraethoxysilane (TEOS, purity ≥ 99%) was provided by Alfa Aesar China (Tianjin) Co., Ltd.

**Phase behavior observation.** The apparatus for determining the high-pressure phase behavior was similar to that reported previously.<sup>1</sup> It was composed mainly of a high-pressure pump, a constant-temperature water bath, a pressure gauge, a view cell with a magnetic stirrer. In the experiment, the F87 aqueous solution was loaded into the cell and CO<sub>2</sub> was charged into the cell until a suitable pressure was reached at 25 °C. A magnetic stirrer was used to accelerate the mixing of CO<sub>2</sub> and the solution. After the system had reached equilibrium, the stirrer was stopped and the phase behavior was observed.

**Small angle X-ray scattering (SAXS).** SAXS experiments were carried out at Beamline 1W2A at the Beijing Synchrotron Radiation Facility (BSRF). The data were collected using a Pilatus detector with maximum resolution of 981 × 1043 pixels. The wavelength of X-ray was 1.54 Å, and the distance of the sample to detector was 1.31 m. The high-pressure SAXS cell was the same as that used previously.<sup>2</sup> In a typical experiment, the suitable amount of 20 wt% F87 aqueous solution was charged into the cell. Then CO<sub>2</sub> was compressed into the cell to the desired pressure. The X-ray scattering data were recorded at 25 °C after equilibrium had been reached. The 2-D

SAXS images were obtained from the detector and then azimuthally averaged to produce one-dimensional profiles of intensity ( $I$ ) versus wave vector ( $q$ ) using the two-dimensional data reduction program FIT2D.

**UV-vis spectra.** The apparatus for determining the high-pressure UV-vis spectra was similar to that reported previously.<sup>3</sup> In a typical experiment, the desired amount of 20 wt% F87 aqueous solution that contained MO was added into the high-pressure cell. Then CO<sub>2</sub> was charged into the cell until the desired pressure was reached. A stirrer was used to accelerate the dissolution of CO<sub>2</sub> in solution. The UV-vis spectrum was recorded at 25 °C.

**SiO<sub>2</sub> Synthesis.** In a typical experiment, 0.5 mL TEOS was added into 5 mL 20 wt% F87 aqueous solution. Then CO<sub>2</sub> was charged into the mixture under magnetic stirring. CO<sub>2</sub> pressure was increased to 4.50 MPa to get the F87-water gel. The gel was stabilized for 12 h at 25 °C to allow complete hydrolysis of the TEOS to form porous SiO<sub>2</sub>. After releasing CO<sub>2</sub>, the mixture was washed using water and ethanol for several times. Porous SiO<sub>2</sub> were obtained after drying at 60 °C overnight under vacuum.

## 2. RESULTS

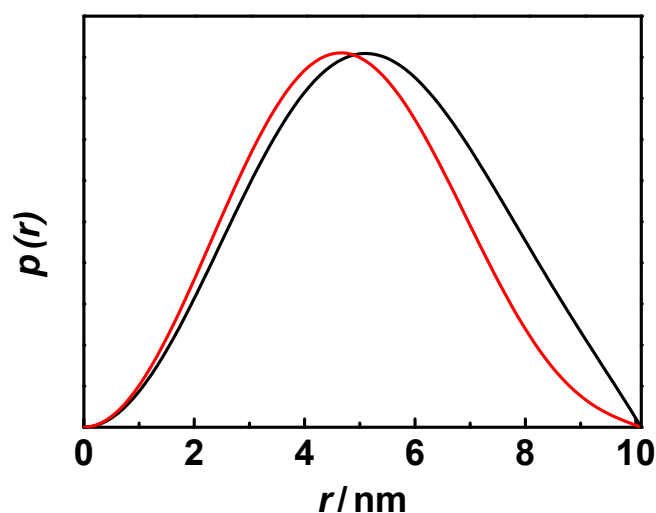

**Fig. S1** Normalized pair-distance distribution function curves corresponding to the SAXS patterns of 20 wt% F87 aqueous solution (black) and at CO<sub>2</sub> pressure 2.26 MPa (red).

**Table S1. Peak positions for the ordered structures extracted from SAXS measurements.**

| P<br>/MPa | $q^*$<br>/nm <sup>-1</sup> | $(4/3)^{1/2}q^*$<br>/nm <sup>-1</sup> | $(8/3)^{1/2}q^*$<br>/nm <sup>-1</sup> | $3^{1/2}q^*$<br>/nm <sup>-1</sup> | $(11/3)^{1/2}q^*$<br>/nm <sup>-1</sup> | $2q^*$<br>/nm <sup>-1</sup> |
|-----------|----------------------------|---------------------------------------|---------------------------------------|-----------------------------------|----------------------------------------|-----------------------------|
| 3.80      | 0.495                      | /                                     | /                                     | 0.862                             | /                                      | /                           |
| 4.02      | 0.497                      | /                                     | /                                     | 0.867                             | /                                      | 0.998                       |
| 4.10      | 0.471                      | /                                     | 0.782                                 | /                                 | /                                      | 0.925                       |

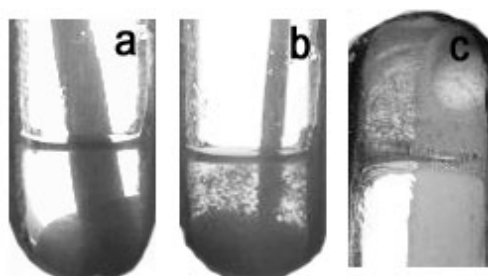

**Fig. S2** Photographs of 20 wt% F87 aqueous solution without ethylene (a) and in presence of ethylene at 2.64 MPa (b, c) and 35 °C.

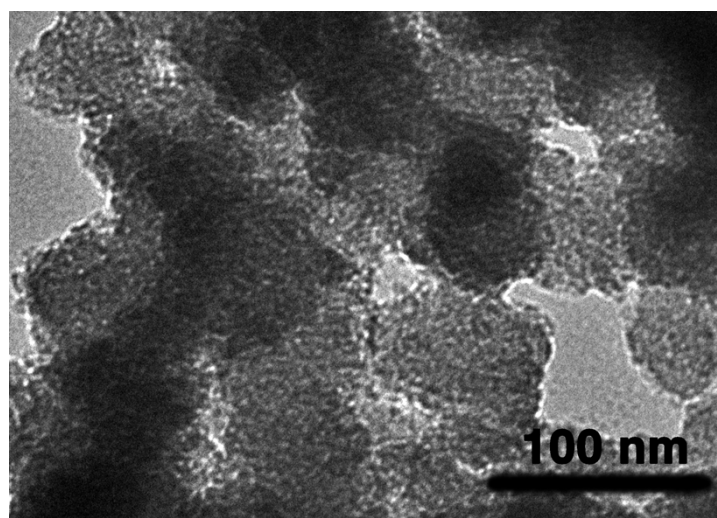

**Fig. S3** TEM image of the SiO<sub>2</sub> synthesized in the CO<sub>2</sub>-induced gel.

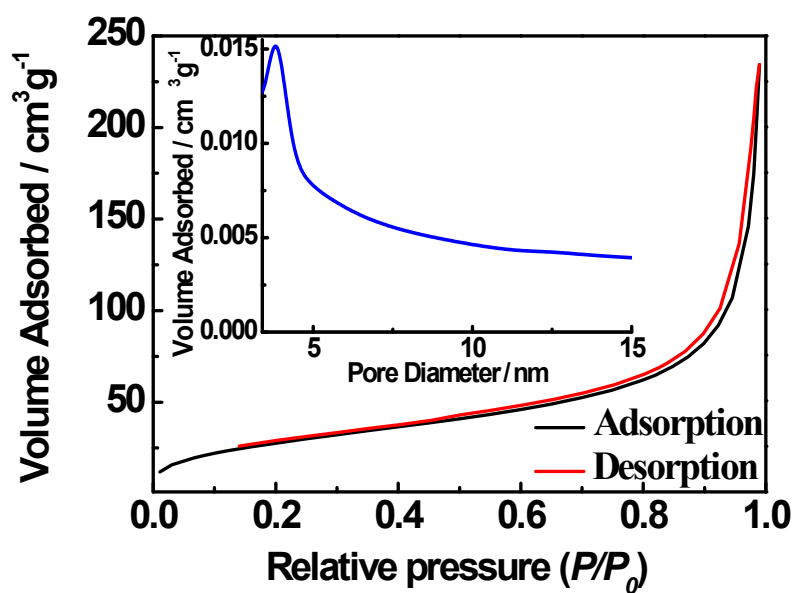

**Fig. S4** N<sub>2</sub> adsorption-desorption isotherms of the SiO<sub>2</sub> synthesized in the CO<sub>2</sub>-induced gel. The inset shows the mesopore size distribution.

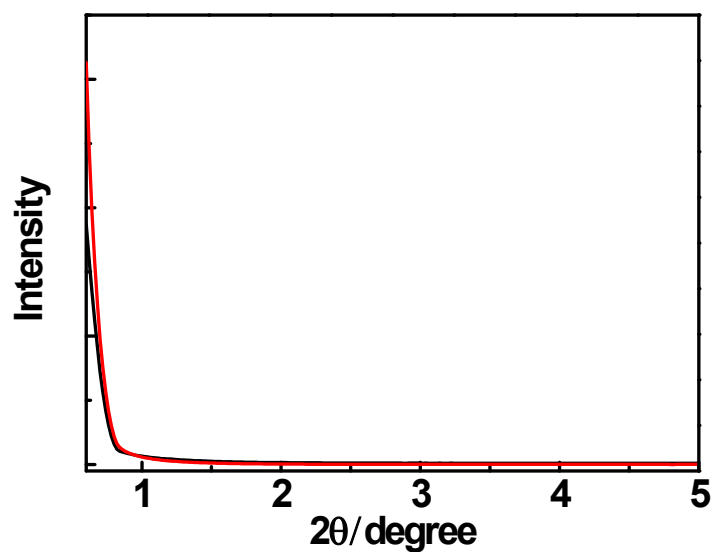

**Fig. S5** Small-angle X-ray diffraction patterns of slide blank (black) the SiO<sub>2</sub> synthesized in the CO<sub>2</sub>-induced gel (red).

### References

- 1 J. L. Zhang, B. X. Han, W. Li, Y. J. Zhao and M. Q. Hou, *Angew. Chem. Int. Ed.*, 2008, **47**, 10119.
- 2 J. L. Zhang, B. X. Han, Y. J. Zhao, J. S. Li and G. Y. Yang, *Chem. -Eur. J.*, 2011, **17**, 4266.
- 3 Y. J. Zhao, J. L. Zhang, Q. Wang, W. Li, J. S. Li, B. X. Han, Z. H. Wu, K. H. Zhang and Z. H. Li, *Langmuir*, 2010, **26**, 4581.
